# Supplementary material for: Implizite Einstellungen von Kindern im Grundschulalter gegenüber Menschen mit Migrationshintergrund
Source: Atypon-hosted journal article supplement (doi:10.1024/1010-0652/a000320), 2021-06-25
Supplement: 1010-0652_a000320_esm1.pdf [file 1010-0652_a000320_esm1.pdf]

IMPLIZITE EINSTELLUNGEN GRUNDSCHULKINDER

**Elektronisches Supplement 1.** Ergebnisse Voranalysen.

**Tabelle A.** *T*-Test Ergebnisse zu Unterschieden in Alter, Deutsch- und Mathematiknote, Geschlecht sowie Bücher im Haushalt

|                                 | Mit MIG       | Ohne MIG      |                |          |          |
|---------------------------------|---------------|---------------|----------------|----------|----------|
|                                 | <i>M (SD)</i> | <i>M (SD)</i> | <i>t</i> (237) | <i>p</i> | <i>d</i> |
| Alter                           | 9.84 (0.64)   | 9.86 (0.61)   | 0.15           | .880     | 0.03     |
| Deutschnote <sup>a</sup>        | 2.64 (0.84)   | 2.59 (0.99)   | -0.26          | .797     | -0.04    |
| Mathematiknote <sup>a</sup>     | 2.80 (0.95)   | 2.53 (0.95)   | -1.65          | .099     | -0.28    |
| Geschlecht <sup>b</sup>         | 0.59 (0.50)   | 0.41 (0.49)   | -2.19          | .029     | -0.37    |
| Bücher im Haushalt <sup>c</sup> | 2.41 (1.11)   | 3.12 (1.20)   | 3.62           | <.001    | 0.60     |

*Anmerkungen.* *N* = 240; <sup>a</sup> 1 = *Sehr gut* bis 6 = *Ungenügend*; <sup>b</sup> 0 = *Junge*, 1 = *Mädchen*; <sup>c</sup> 1 = *Keine oder nur sehr wenige (0-10 Bücher)* bis 5 = *Genug, um drei oder mehr Regale zu füllen (200 Bücher)*.
