# Supplementary material for: Implizite Einstellungen von Kindern im Grundschulalter gegenüber Menschen mit Migrationshintergrund
Source: Atypon-hosted journal article supplement (doi:10.1024/1010-0652/a000320), 2021-06-25
Supplement: 1010-0652_a000320_esm2.pdf [file 1010-0652_a000320_esm2.pdf]

**Elektronisches Supplement 2.** Zielkonzepte und Attribut-Zielkonzepte.

**Tabelle A.** Verwendete Wörter für die Zielkonzepte „Deutsch“ und „Türkisch“ sowie für die Attribut-Zielkonzepte „Positiv“ und „Negativ“

| Zielkonzepte |            | Attribut-Zielkonzepte |             |
|--------------|------------|-----------------------|-------------|
| „Deutsch“    | „Türkisch“ | „Positiv“             | „Negativ“   |
| Berlin       | Istanbul   | fleißig               | dumm        |
| Hamburg      | Antalya    | schlau                | unpünktlich |
| München      | Izmir      | motiviert             | gelangweilt |
| Köln         | Ankara     | neugierig             | faul        |
| Hannah       | Elif       | pünktlich             | unhöflich   |
| Anna         | Zeynep     | aufmerksam            | laut        |
| Emma         | Nehir      | sorgfältig            | abgelenkt   |
| Lukas        | Yusuf      | begabt                | ängstlich   |
| Jonas        | Eymen      | selbstständig         | störend     |
| Paul         | Mustafa    | interessiert          | frech       |

**Anmerkung.** Block 1 umfasste 20 Durchgänge, in denen die zehn Wörter der Kategorien „Deutsch“ und „Türkisch“ randomisiert präsentiert wurden. Block 2 umfasste ebenfalls 20 Durchgänge, in denen die zehn Wörter der Kategorien „Positiv“ und „Negativ“ randomisiert präsentiert wurden. In den Blöcken 3 und 6 wurden in 20 Durchgängen je fünf Wörter jeder Kategorie randomisiert präsentiert. Die Blöcke 4 und 7 umfassten 40 Durchgänge, in denen die zehn Wörter der vier Kategorien randomisiert präsentiert wurden. In Block 5 wurde der Konzeptwechsel in 40 Durchgängen eingeübt. Die zehn Wörter der Kategorien „Türkisch“ und „Deutsch“ wurden zweimal randomisiert präsentiert.
