# Supplementary material for: Implizite Einstellungen von Kindern im Grundschulalter gegenüber Menschen mit Migrationshintergrund
Source: Atypon-hosted journal article supplement (doi:10.1024/1010-0652/a000320), 2021-06-25
Supplement: 1010-0652_a000320_esm3.pdf [file 1010-0652_a000320_esm3.pdf]

**Elektronisches Supplement 3.** Weitere Analysen.

Ergebnisse Kovarianzanalyse mit zusätzlichem Faktor Klassenkomposition

Es lag ein signifikanter Haupteffekt für den Faktor Migrationshintergrund ( $F(1,235) = 35.87$ ,  $p < .001$ ,  $\eta_p^2 = .13$ ) vor, jedoch nicht für den Faktor Klassenkomposition ( $F(1,235) = 2.66$ ,  $p = .104$ ). Die Kovariate Geschlecht wurde signifikant ( $F(1,235) = 7.75$ ,  $p = .006$ ,  $\eta_p^2 = .03$ ), Bücher nicht ( $F(1,235) = 1.35$ ,  $p = .247$ ).

## IMPLIZITE EINSTELLUNGEN GRUNDSCHULKINDER

**Tabelle A.** Subgruppenspezifische multiple Regressionsanalysen zu Fragestellung 3

| Variablen                                   | Modell 1 |           |          | Modell 2 |           |          |
|---------------------------------------------|----------|-----------|----------|----------|-----------|----------|
|                                             | $\beta$  | <i>SE</i> | <i>p</i> | $\beta$  | <i>SE</i> | <i>p</i> |
| Soziale Integration <sup>a</sup>            | -.03     | 0.08      | .669     | .07      | 0.15      | .709     |
| Diskriminierung <sup>a</sup>                | -.13     | 0.07      | .091     | -.04     | 0.15      | .806     |
| Identifikation mit Deutschland <sup>a</sup> | .01      | 0.08      | .878     | .27      | 0.15      | .136     |
| <i>R</i> <sup>2</sup>                       |          |           | .00      |          |           | .03      |

*Anmerkungen.* Modell 1:  $n = 195$ , Modell 2:  $n = 44$ , Modell 1: Kinder ohne Migrationshintergrund, Modell 2: Kinder mit türkischem Migrationshintergrund, Berechnungen basieren auf klasseninternen  $z$ -standardisierten Variablen, Modell 1 ( $F(3, 191) = 1.00, p = .392, f^2 = 0.00$ ) und Modell 2 waren statistisch nicht signifikant ( $F(3, 40) = 1.38, p = .264, f^2 = 0.03$ ); <sup>a</sup> Vierstufige Likert-Skala von 1 = *Stimmt gar nicht* bis 4 = *Stimmt genau*.

Ergänzung: Bei Aufnahme der Kontrollvariablen Geschlecht und Anzahl der Bücher bleibt das Befundmuster bestehen: keine der drei interessierenden Variablen steht in statistisch signifikantem Zusammenhang mit dem *D*-Maß.

## IMPLIZITE EINSTELLUNGEN GRUNDSCHULKINDER

Multiple Regressionsanalysen für den Zusammenhang zwischen impliziten Einstellungen und den Variablen soziale Integration, Diskriminierung und Identifikation mit Deutschland

**Tabelle B.** Ergebnisse unter Berücksichtigung der Klassenkomposition

| Variablen                                   | Modell 1 |           |          | Modell 2 |           |          | Modell 3 |           |          | Modell 4 |           |          |
|---------------------------------------------|----------|-----------|----------|----------|-----------|----------|----------|-----------|----------|----------|-----------|----------|
|                                             | $\beta$  | <i>SE</i> | <i>p</i> |
| Geschlecht <sup>a</sup>                     | .15      | 0.07      | .027     | .13      | 0.07      | .041     | .13      | 0.06      | .049     | .15      | 0.06      | .021     |
| Bücher im Haushalt <sup>b</sup>             | .08      | 0.06      | .242     | .08      | 0.06      | .226     | .08      | 0.06      | .204     | .07      | 0.06      | .262     |
| Klassenkomposition <sup>c</sup>             | .01      | 0.06      | .882     | .00      | 0.06      | >.999    | .01      | 0.06      | .881     | .00      | 0.06      | >.999    |
| Soziale Integration <sup>d</sup>            | -.03     | 0.07      | .694     | .02      | 0.07      | .793     |          |           |          |          |           |          |
| Diskriminierung <sup>d</sup>                | -.09     | 0.07      | .189     |          |           |          | -.10     | 0.06      | .137     |          |           |          |
| Identifikation mit Deutschland <sup>d</sup> | .14      | 0.07      | .046     |          |           |          |          |           |          | .14      | 0.06      | .037     |
| <i>R</i> <sup>2</sup>                       |          |           | .03      |          |           | .01      |          |           | .02      |          |           | .03      |

*Anmerkungen.* Modell 1 und 3:  $N = 239$ , Modelle 2 und 4:  $N = 240$ , Berechnungen basieren auf klasseninternen z-standardisierten Variablen, Modell 1 ( $F(6, 232) = 2.05, p = .060, f^2 = 0.03$ ), Modell 2 ( $F(4, 235) = 1.48, p = .208, f^2 = 0.01$ ) und Modell 3 ( $F(3, 234) = 2.03, p = .092, f^2 = 0.02$ ) waren statistisch nicht signifikant. Modell 4 ( $F(4, 235) = 2.60, p = .037, f^2 = 0.03$ ) war statistisch signifikant; <sup>a</sup> 0 = Junge, 1 = Mädchen; <sup>b</sup> 1 = Keine oder nur sehr wenige (0–10 Bücher) bis 5 = Genug, um drei oder mehr Regale zu füllen (200 Bücher); <sup>c</sup> 0 = Klassen ohne Kinder mit türkischem MIG, 1 = Klassen mit Kindern mit türkischem MIG; <sup>d</sup> Vierstufige Likert-Skala von 1 = Stimmt gar nicht bis 4 = Stimmt genau.

IMPLIZITE EINSTELLUNGEN GRUNDSCHULKINDER

**Tabelle C.** Ergebnisse unter Berücksichtigung der Klassenkomposition und des Migrationshintergrundes (MIG)

| Variablen                                   | Modell 1 |           |          | Modell 2 |           |          | Modell 3 |           |          | Modell 4 |           |          |
|---------------------------------------------|----------|-----------|----------|----------|-----------|----------|----------|-----------|----------|----------|-----------|----------|
|                                             | $\beta$  | <i>SE</i> | <i>p</i> |
| Geschlecht <sup>a</sup>                     | .19      | 0.06      | .003     | .19      | 0.06      | .003     | .18      | 0.06      | .004     | .19      | 0.06      | .002     |
| Bücher im Haushalt <sup>b</sup>             | .04      | 0.06      | .568     | .03      | 0.06      | .589     | .04      | 0.06      | .541     | .03      | 0.06      | .598     |
| Klassenkomposition <sup>c</sup>             | .11      | 0.06      | .093     | .11      | 0.06      | .105     | .11      | 0.06      | .079     | .10      | 0.06      | .121     |
| MIG <sup>d</sup>                            | -.33     | 0.06      | <.001    | -.34     | 0.06      | <.001    | -.34     | 0.06      | <.001    | -.33     | 0.06      | <.001    |
| Soziale Integration <sup>e</sup>            | -.03     | 0.07      | .689     | -.00     | 0.06      | .968     |          |           |          |          |           |          |
| Diskriminierung <sup>e</sup>                | -.09     | 0.06      | .142     |          |           |          | -.10     | 0.06      | .121     |          |           |          |
| Identifikation mit Deutschland <sup>e</sup> | .07      | 0.07      | .268     |          |           |          |          |           |          | .07      | 0.06      | .248     |
| <i>R</i> <sup>2</sup>                       |          |           | .11      |          |           | .11      |          |           | .12      |          |           | .11      |

*Anmerkungen.* Modell 1 und 3:  $N = 239$ , Modelle 2 und 4:  $N = 240$ , Berechnungen basieren auf klasseninternen  $z$ -standardisierten Variablen, Modell 1 ( $F(7, 231) = 5.39, p < .001, f^2 = 0.13$ ), Modell 2 ( $F(5, 234) = 6.81, p < .001, f^2 = 0.12$ ), Modell 3 ( $F(5, 233) = 7.32, p < .001, f^2 = 0.13$ ) und Modell 4 ( $F(5, 234) = 7.11, p < .001, f^2 = 0.13$ ) waren statistisch signifikant; <sup>a</sup> 0 = Junge, 1 = Mädchen; <sup>b</sup> 1 = Keine oder nur sehr wenige (0–10 Bücher) bis 5 = Genug, um drei oder mehr Regale zu füllen (200 Bücher); <sup>c</sup> 0 = Klassen ohne Kinder mit türkischem MIG, 1 = Klassen mit Kindern mit türkischem MIG; <sup>d</sup> 0 = Kinder ohne MIG, 1 = Kinder mit türkischem MIG; <sup>e</sup> Vierstufige Likert-Skala von 1 = *Stimmt gar nicht* bis 4 = *Stimmt genau*.
